# Supplementary material for: Intact cell lipidomics using the Bruker MBT lipid Xtract assay allows the rapid detection of glycosyl-inositol-phospho-ceramides from Aspergillus fumigatus
Source: Royal Society of Chemistry journal article supplement (doi:10.1039/d4mo00030g), 2024-03-28
Supplement: d4mo00030g1.pdf [file d4mo00030g1.pdf]

Electronic supplementary information (ESI) file (raw MS data)

| <b>Spotset_2</b> |               | <b>Spotset_1</b> |               |
|------------------|---------------|------------------|---------------|
| <b>Spot</b>      | <b>Strain</b> | <b>Spot</b>      | <b>Strain</b> |
| B9               | CEA102        | D11              | CEA10         |
| B6               | 123           | E3               | 123           |
| A8               | 21            | E4               | 21            |
| A1               | 172           | E5               | 172           |
| A3               | 12            | E6               | 12            |
| A5               | 82            | E7               | 82            |
| B4               | 54            | E8               | 54            |
| A6               | 80            | E9               | 80            |
| B3               | 148           | E10              | 148           |
| B1               | 162           | E11              | 162           |
| B10              | 19            | E12              | 19            |
| A7               | 128           | F1               | 128           |
| A11              | 5             | F2               | 5             |
| A10              | 109           | F3               | 109           |
| B2               | 158           | F4               | 158           |
| B5               | 9             | F5               | 9             |
| B7               | 69            | F7               | 69            |
| A4               | 122           | F8               | 122           |
| A12              | 131           | F9               | 131           |
